# Supplementary material
Source: Springer Nature journal article supplement (https://www.springermedizin.de/resource/supplementary/12889_2010_2585_MOESM1_ESM.pdf/9486550)

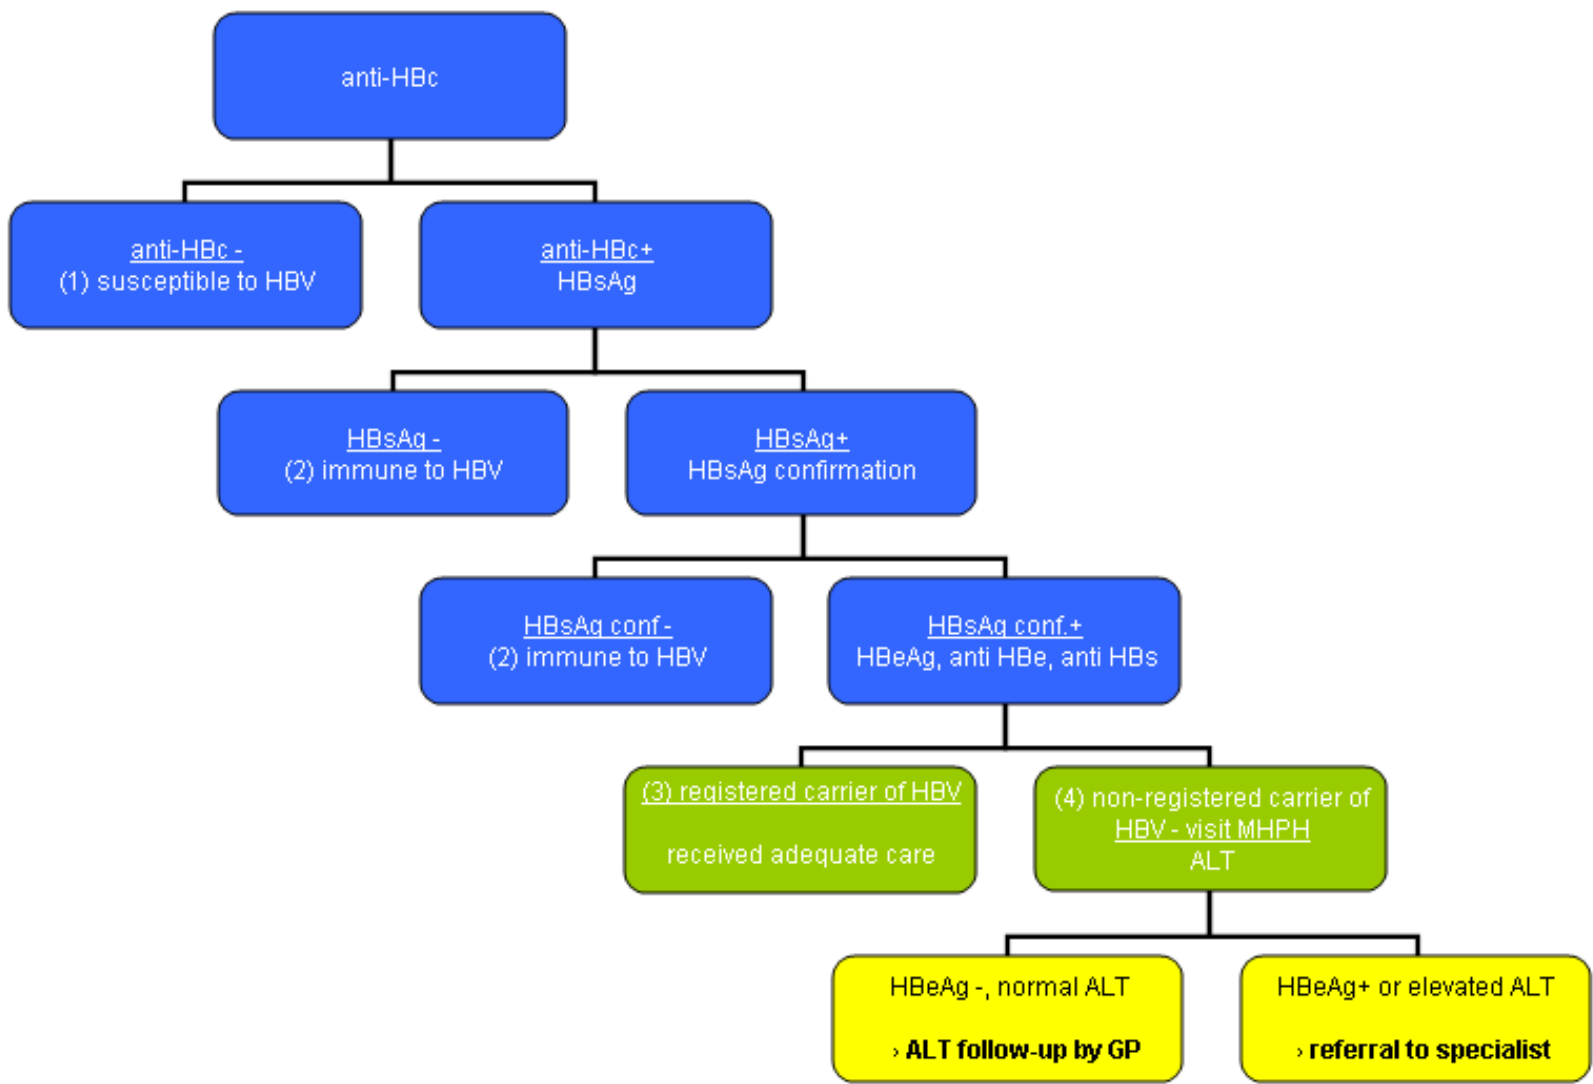

Supplement: MOESM1 [file 9486550]
